# Supplementary material
Source: Springer Nature journal article supplement (https://www.springermedizin.de/resource/supplementary/12936_2008_783_MOESM1_ESM.pdf/9548900)

Screened 1831 under five years

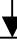

1234 had positive smear

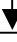

455 patients met inclusion criteria and were randomized

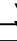

219 patients were assigned to receive CQ

115 patients were assigned to receive AQ

121 patients were assigned to receive SP

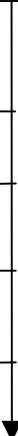

8 case of pruritus

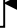

2 case of travel

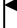

2 case of convulsion

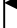

5 case of repeated vomiting

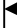

202 patients was analyzable at day 14 of follow up

202 patients analyzable at day 28 of follow up

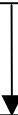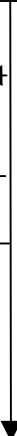

5 case of pruritus

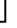

1 case of travel

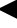

1 case of repeated vomiting

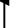

108 patients was analyzable at day 14 of follow up

108 patients was analyzable at day 28 of follow up

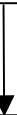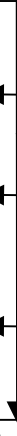

1 case of travel

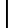

2 case of polyspecific infection at day 1

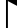

1 case of withdrawal because of venous blood taking

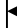

116 patients was analyzable at day 14

115 patients was analyzable at day 28

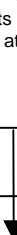

Stopped at day 14

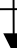

1 case of withdrawal of consent

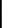

Supplement: MOESM1 [file 9548900]
